# Supplementary figures and images for: Deciphering the Duality of Clock and Growth Metabolism in a Cell Autonomous System Using NMR Profiling of the Secretome
Source: MDPI journal article supplement (doi:10.3390/metabo6030023), 2016-07-26

**PC1**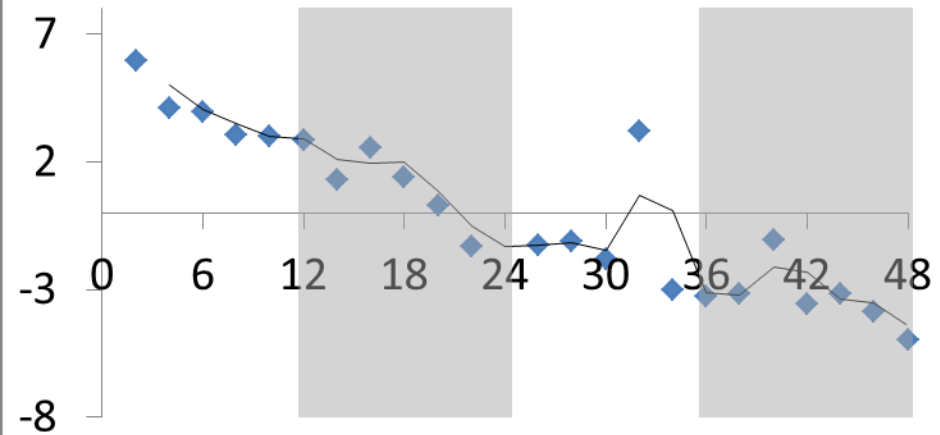**PC2**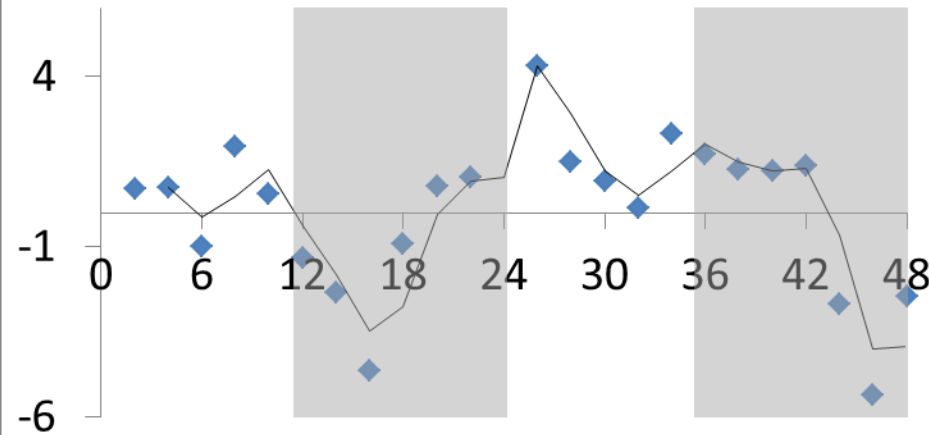**PC3**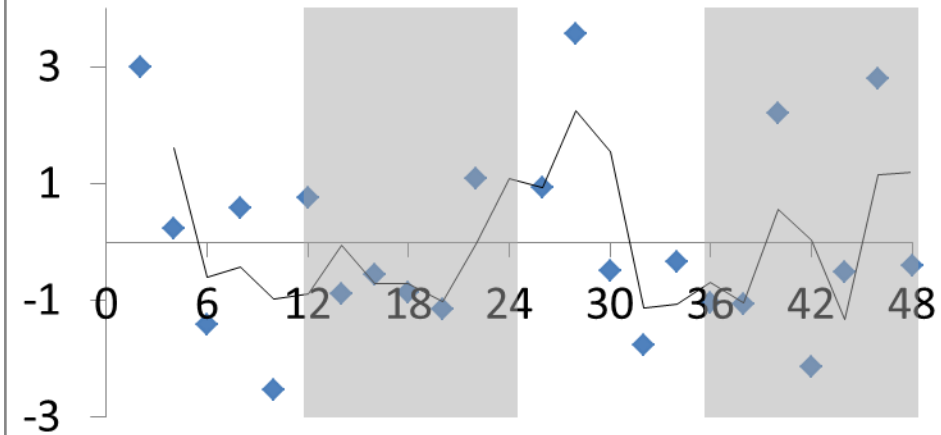

Supplement: s1 [file s1]

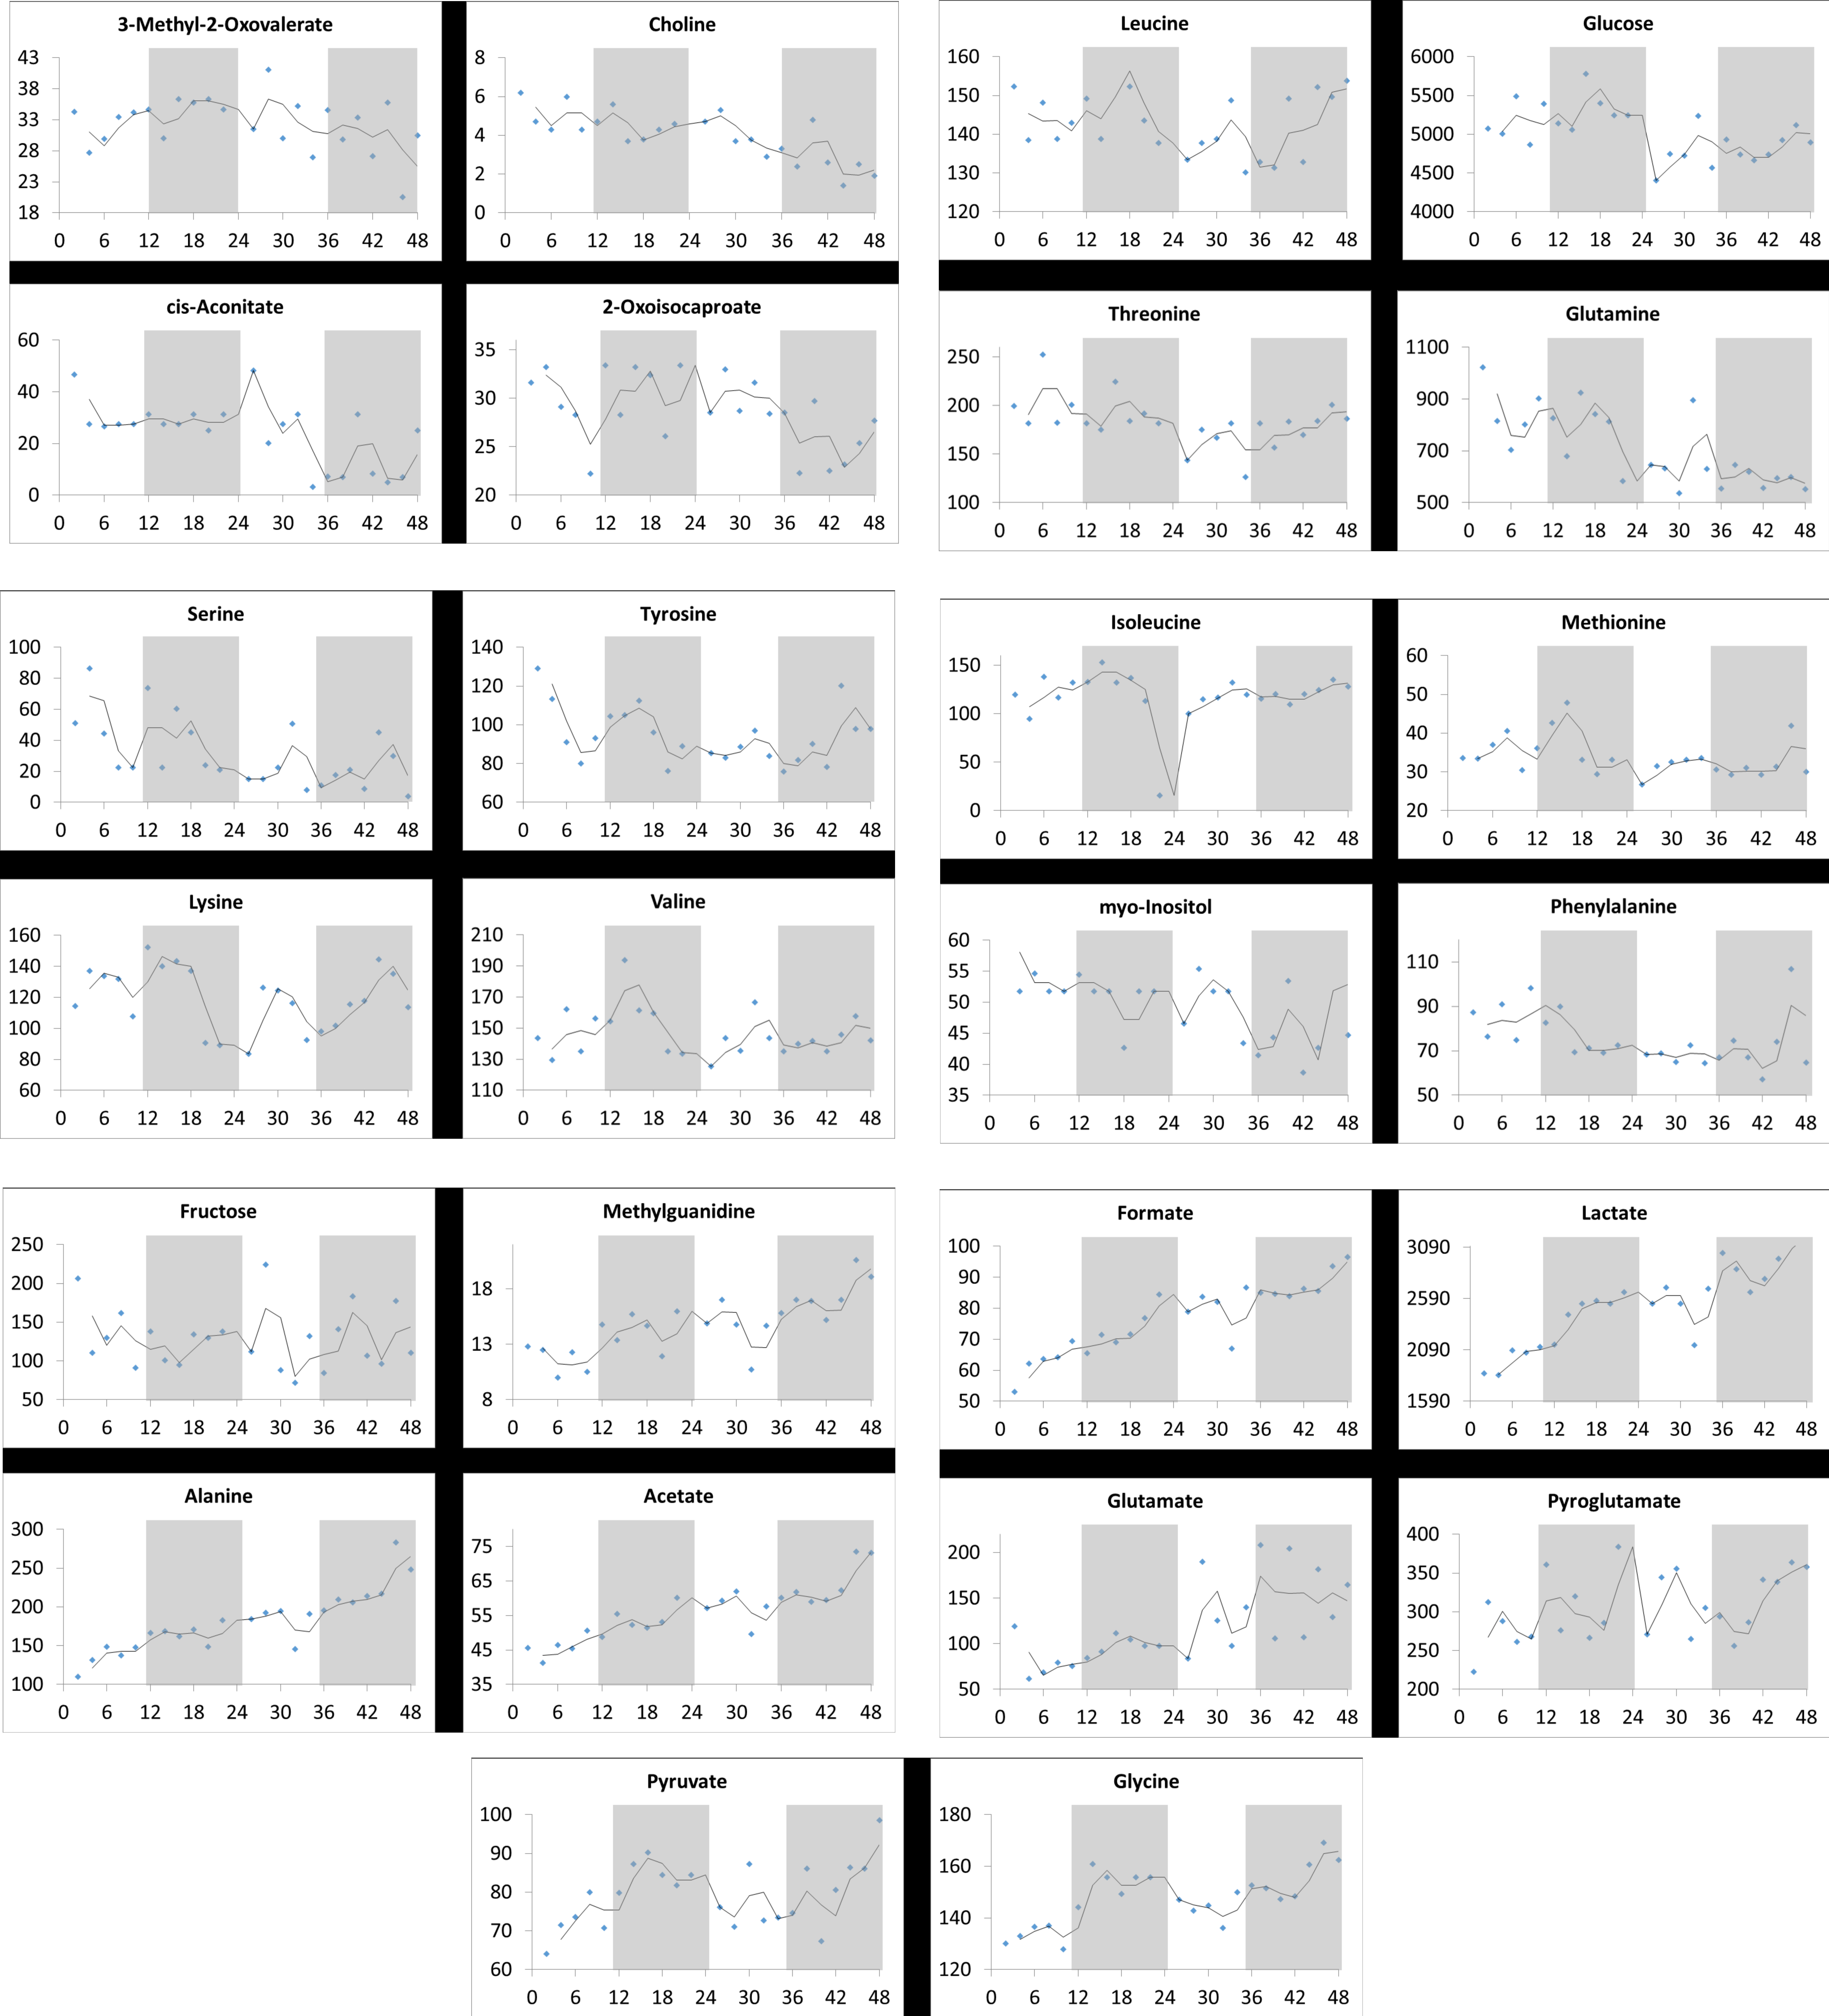

Supplement: s1 [file s1]
